# Supplementary material for: Deciphering potential causative factors for undiagnosed Waardenburg syndrome through multi-data integration
Source: PubMed Central journal article supplement (PMC11155130; doi:10.1186/s13023-024-03220-y), 2024-06-06

**Additional file 5** Distribution of pathogenic gene variants in gene structure.

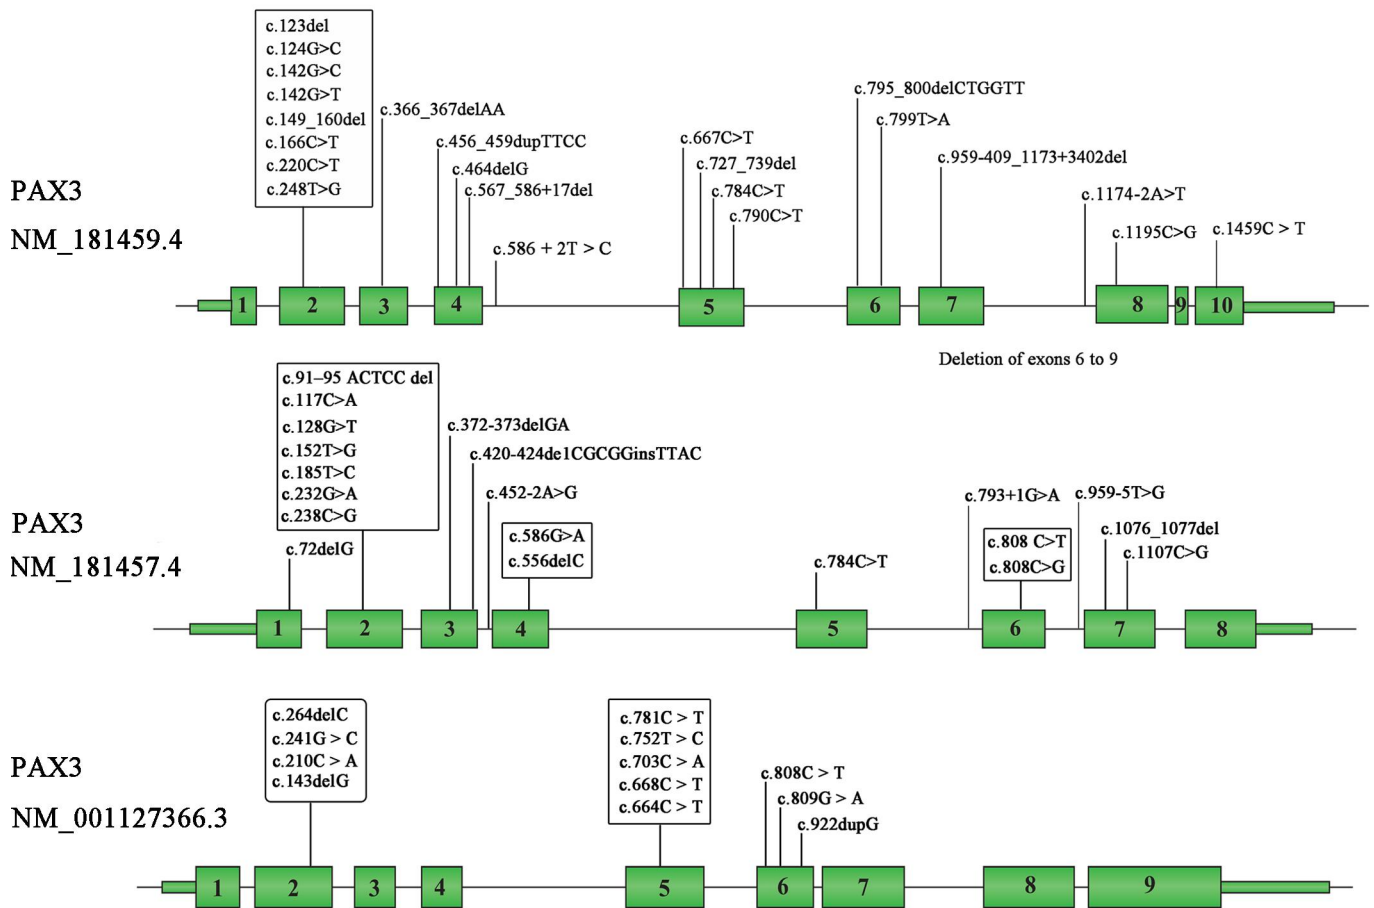

MITF

NM\_198159.3

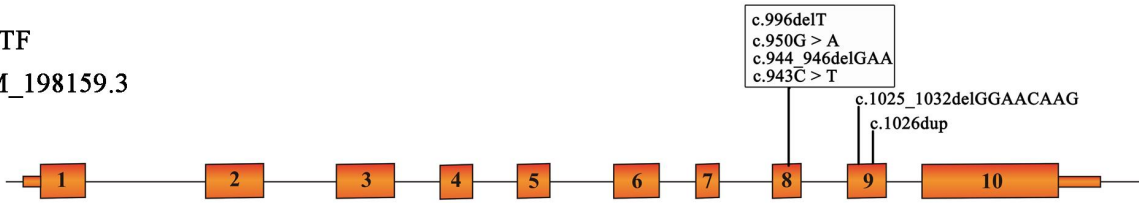

MITF

NM\_000248.4

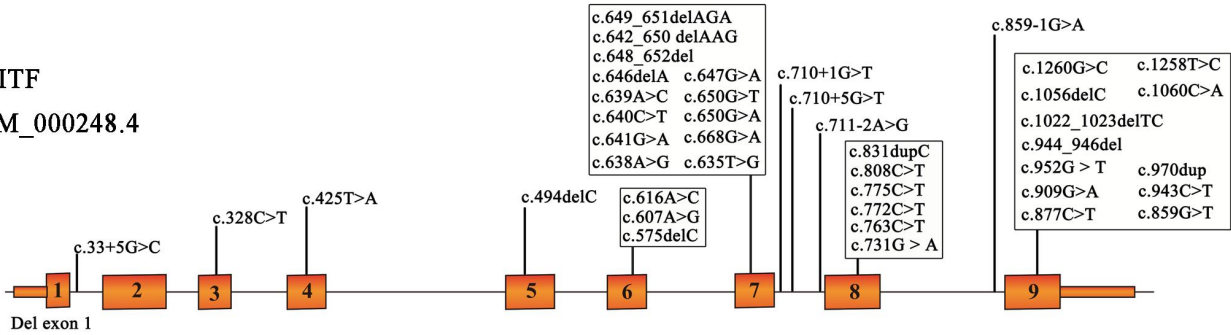

SOX10

NM\_006941.4

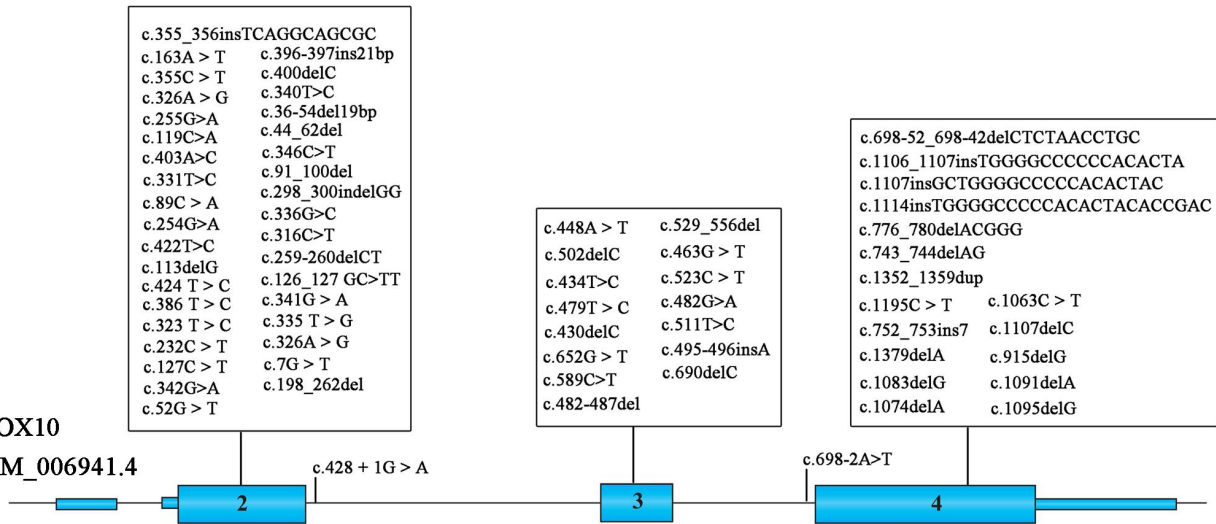

EDNRB

NM\_000115.5

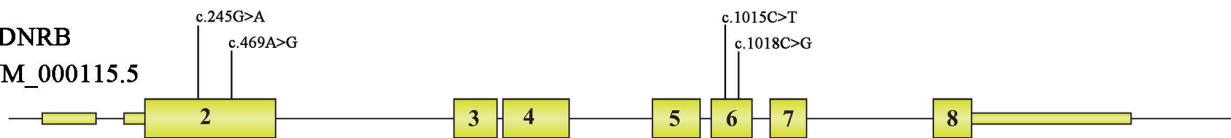

SNAI2

NM\_003068.5

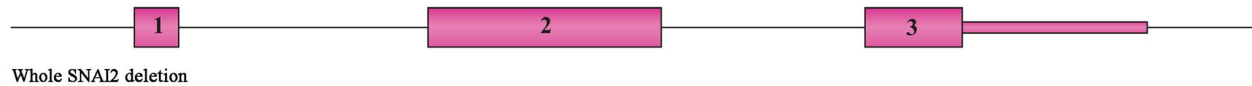

KITLG

NM\_000899.5

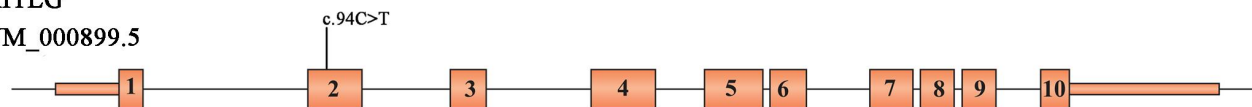

EDN3

NM\_001302455.2

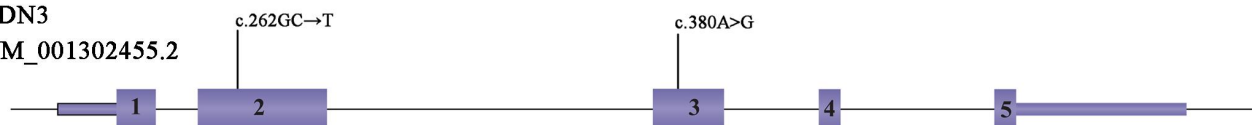

Supplement: 13023_2024_3220_MOESM4_ESM.pdf [file 13023_2024_3220_MOESM4_ESM.pdf]
