# Supplementary material for: Deciphering potential causative factors for undiagnosed Waardenburg syndrome through multi-data integration
Source: Orphanet J Rare Dis. 2024 Jun 6;19:226. doi: 10.1186/s13023-024-03220-y (PMC11155130; doi:10.1186/s13023-024-03220-y)
Supplement: Supplementary file 1 — Supplementary Material 1 [file 13023_2024_3220_MOESM1_ESM.pdf]

**Additional file 2** The phenotype overview of *KIT*, *CHD7*, *EP300* and *SNAI3* genes with mutations in mice.

[illegible]
